# Supplementary material for: The Metabolome of Carbapenem-Resistant Klebsiella pneumoniae Infection in Plasma
Source: Hindawi journal article supplement (doi:10.1155/2021/7155772), 2021-10-22
Supplement: f1 [file 7155772.f1.pdf]

## Supplementary Appendix

The metabolome of carbapenem-resistant *Klebsiella pneumoniae* infection in plasma

**Supplementary Figure S1.** Spearman correlation coefficient analysis. The value  $>0$  indicates a positive correlation, while a value  $<0$  indicates a negative correlation.

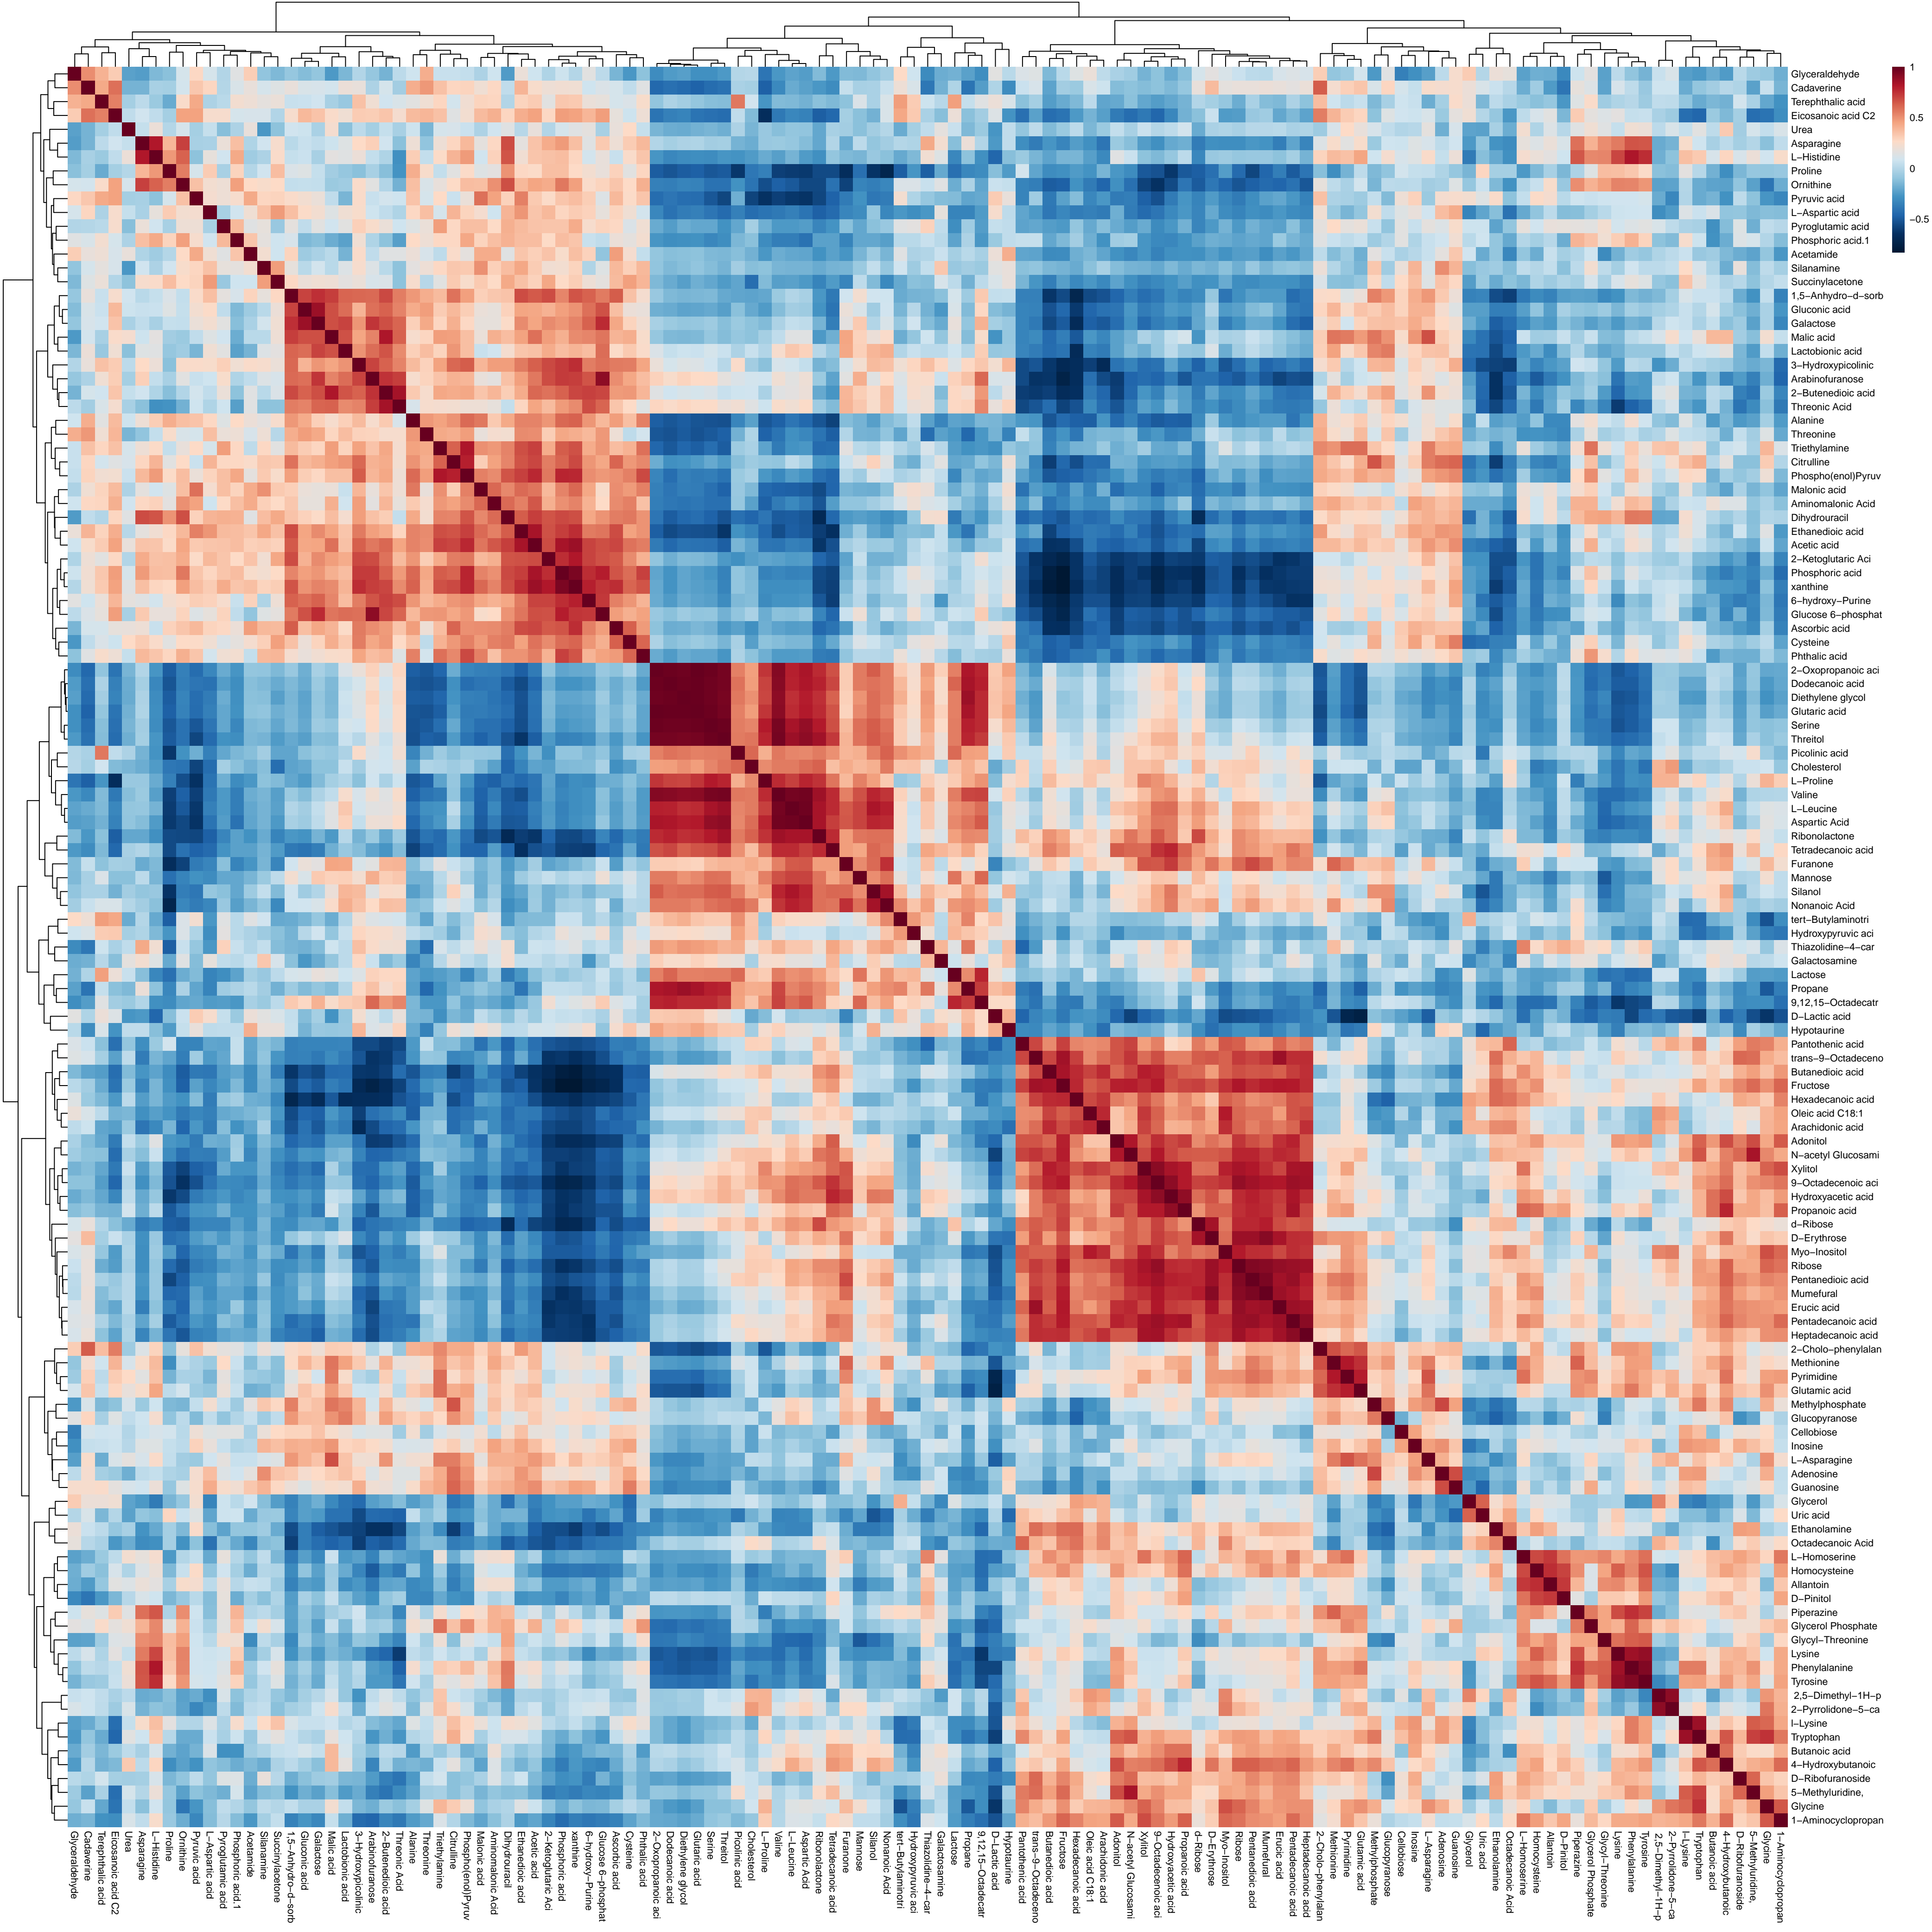

A

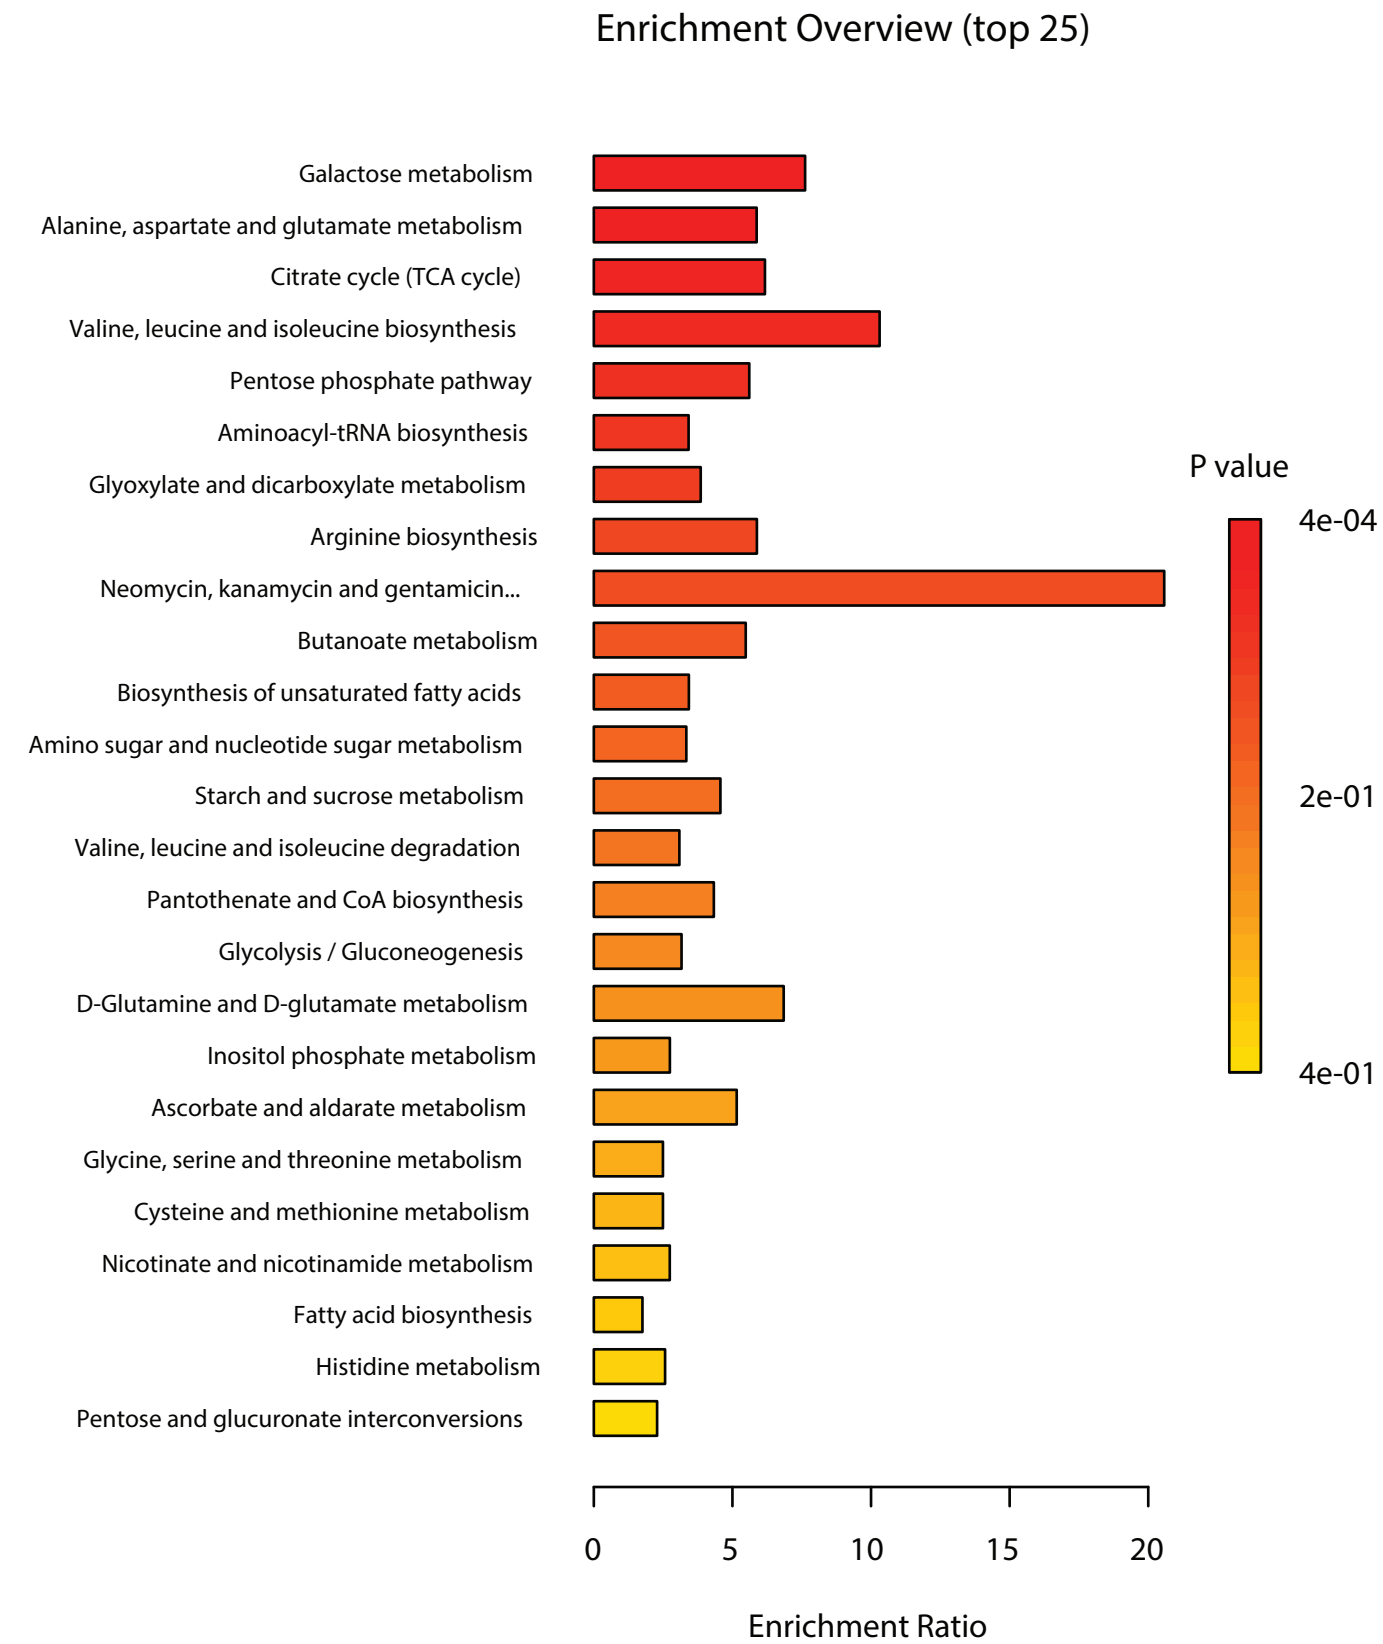

B

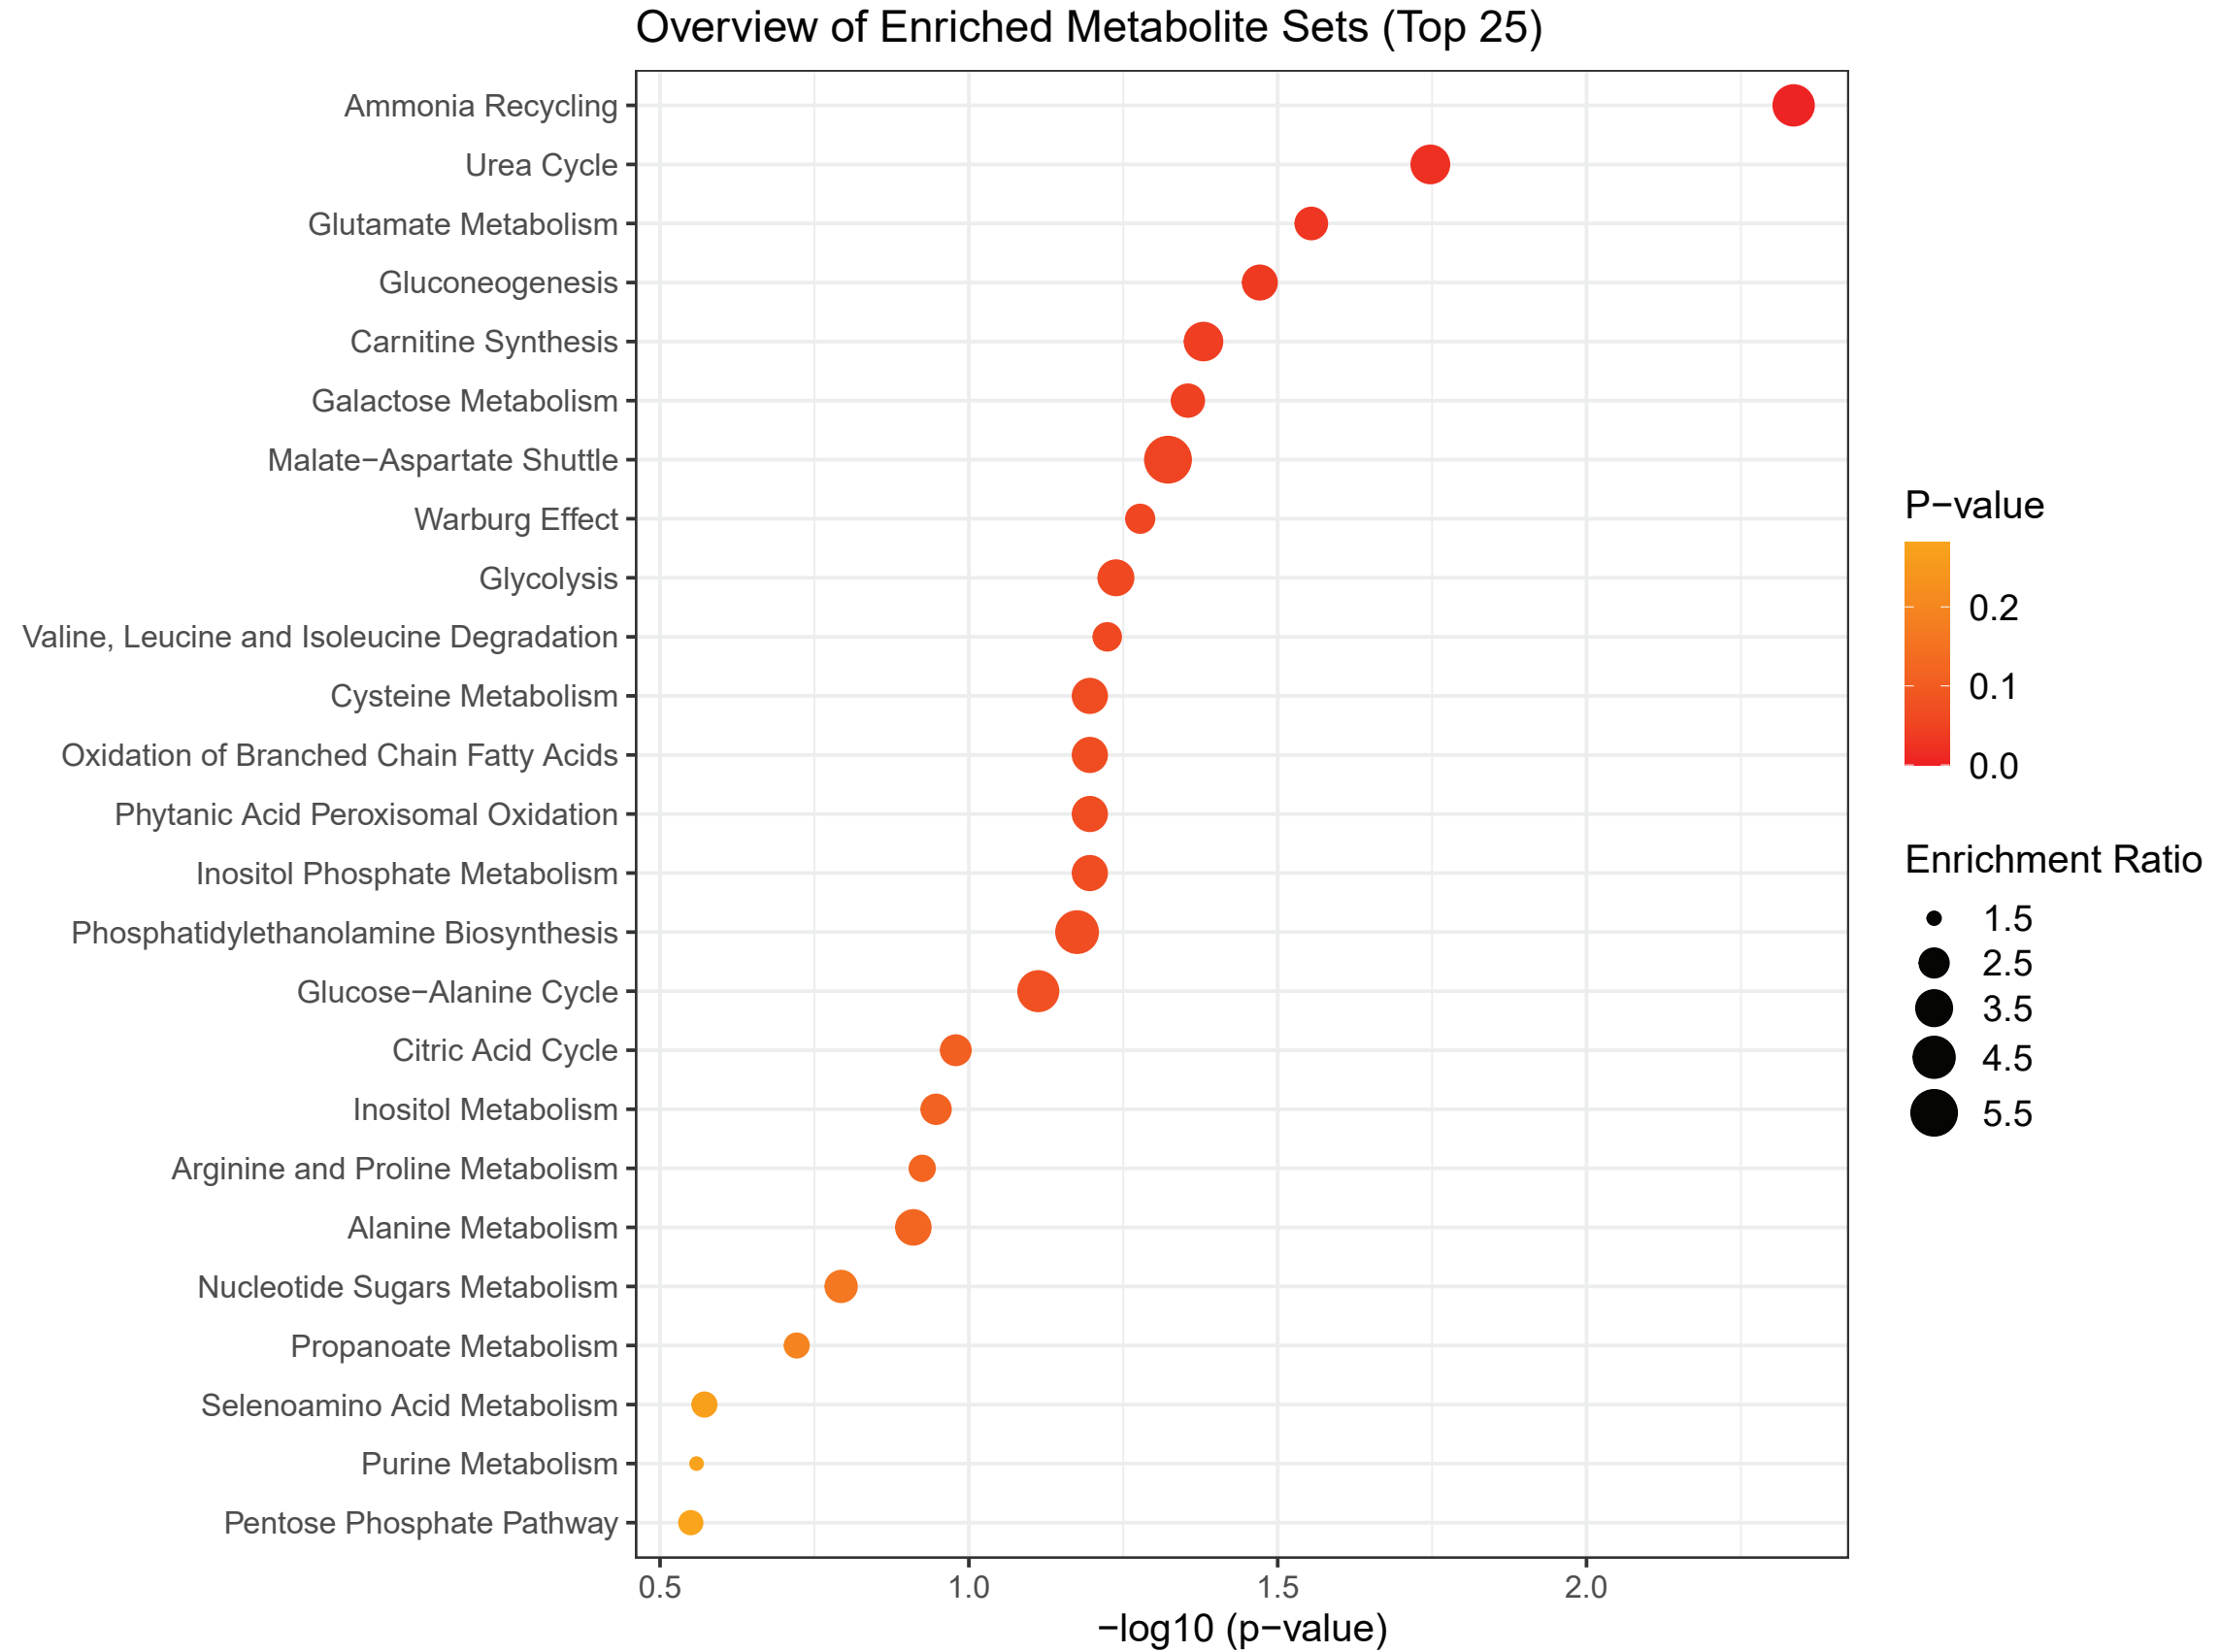

**Supplementary Figure S2.** Function enrichment analysis. A, KEGG pathway analysis; B, GO pathway enrichment.

Supplementary Table 1. Carbapenem-resistant *Klebsiella pneumoniae* infection-associated metabolites.

|                           | t.stat  | p.value  | Log2(Fold Change) | FDR      |
|---------------------------|---------|----------|-------------------|----------|
| 6-hydroxy-Purine          | 9.4068  | 3.10E-11 | 2.2669            | 3.94E-09 |
| Fructose                  | -8.7823 | 1.77E-10 | -1.8892           | 1.12E-08 |
| xanthine                  | 8.3184  | 6.66E-10 | 1.9067            | 2.24E-08 |
| 1,5-Anhydro-d-sorbitol    | 8.2989  | 7.05E-10 | 1.4794            | 2.24E-08 |
| Butanedioic acid          | 7.5598  | 6.14E-09 | 3.0752            | 1.56E-07 |
| 2-Ketoglutaric Acid       | 7.1964  | 1.82E-08 | 3.4144            | 3.85E-07 |
| Adonitol                  | -7.1115 | 2.35E-08 | -1.976            | 4.26E-07 |
| Pentadecanoic acid C15:0  | -6.9303 | 4.05E-08 | -1.2622           | 6.43E-07 |
| Hexadecanoic acid         | -6.6922 | 8.35E-08 | -1.2278           | 1.11E-06 |
| Ascorbic acid             | 6.6779  | 8.72E-08 | 3.4585            | 1.11E-06 |
| 2-Butenedioic acid        | 6.4698  | 1.64E-07 | 1.2178            | 1.90E-06 |
| Phosphoric acid           | 6.4368  | 1.82E-07 | 1.6334            | 1.93E-06 |
| Glucose 6-phosphate       | 6.2865  | 2.88E-07 | 1.2333            | 2.82E-06 |
| 9-Octadecenoic acid       | -6.1973 | 3.79E-07 | -2.4238           | 3.33E-06 |
| Galactose                 | 6.1849  | 3.94E-07 | 1.0797            | 3.33E-06 |
| N-acetyl Glucosamine      | -5.89   | 9.75E-07 | -1.7167           | 7.31E-06 |
| Acetic acid               | 5.8889  | 9.78E-07 | 1.2204            | 7.31E-06 |
| Arabinofuranose           | 5.8294  | 1.17E-06 | 1.1476            | 8.29E-06 |
| Heptadecanoic acid C17:0  | -5.7833 | 1.35E-06 | -1.7065           | 9.05E-06 |
| Ribose                    | -5.7339 | 1.58E-06 | -2.1442           | 1.00E-05 |
| Xylitol                   | -5.4661 | 3.59E-06 | -1.4808           | 2.17E-05 |
| Gluconic acid             | 5.3334  | 5.41E-06 | 1.1495            | 3.12E-05 |
| d-Ribose                  | -5.2879 | 6.22E-06 | -1.8046           | 3.43E-05 |
| Threonic Acid             | 5.1719  | 8.88E-06 | 1.2476            | 4.70E-05 |
| Ethanedioic acid          | 5.067   | 1.22E-05 | 1.3452            | 6.22E-05 |
| Erucic acid               | -5.0158 | 1.43E-05 | -1.3605           | 6.99E-05 |
| trans-9-Octadecenoic acid | -4.9821 | 1.59E-05 | -1.1162           | 7.46E-05 |
| Pentanedioic acid         | -4.9212 | 1.91E-05 | -1.3698           | 8.67E-05 |
| Mumefural                 | -4.8585 | 2.31E-05 | -3.1114           | 0.000101 |
| Tetradecanoic acid C14:0  | -4.7805 | 2.93E-05 | -1.4179           | 0.000124 |
| Oleic acid C18:1          | -4.7692 | 3.03E-05 | -1.5645           | 0.000124 |
| Propanoic acid            | -4.7505 | 3.21E-05 | -1.5435           | 0.000125 |
| Hydroxyacetic acid        | -4.7477 | 3.24E-05 | -1.088            | 0.000125 |
| Malic acid                | 4.6156  | 4.83E-05 | 1.178             | 0.00018  |
| Myo-Inositol              | -4.4729 | 7.43E-05 | -1.6269           | 0.000269 |
| Arachidonic acid          | -4.4245 | 8.59E-05 | -1.8481           | 0.000303 |
| 3-Hydroxypicolinic acid   | 4.4124  | 8.90E-05 | 1.154             | 0.000306 |
| Pantothenic acid          | -4.242  | 0.000148 | -1.2481           | 0.000494 |
| Ethanolamine              | -3.9799 | 0.00032  | -1.039            | 0.001041 |

|                                    |         |          |         |          |
|------------------------------------|---------|----------|---------|----------|
| Ribonolactone                      | -3.8719 | 0.000437 | -1.8481 | 0.001389 |
| D-Erythrose                        | -3.7709 | 0.000585 | -2.1784 | 0.001812 |
| Octadecanoic Acid                  | -3.5934 | 0.000969 | -2.0753 | 0.002929 |
| Alanine                            | 3.377   | 0.001771 | 1.264   | 0.005229 |
| Dihydrouracil                      | 3.3111  | 0.002121 | 1.243   | 0.006123 |
| Cysteine                           | 3.2603  | 0.002436 | 1.133   | 0.006875 |
| 1-Aminocyclopropanecarboxylic acid | -3.2363 | 0.0026   | -1.121  | 0.007177 |
| Citrulline                         | 3.1469  | 0.003306 | 1.112   | 0.008934 |
| Lactobionic acid                   | 3.1103  | 0.003645 | 1.2739  | 0.009644 |
| 5-Methyluridine,                   | -2.9718 | 0.00525  | -2.3815 | 0.013608 |
| Phospho(enol)Pyruvic acid          | 2.9105  | 0.006155 | 1.2649  | 0.015632 |
| Homocysteine                       | -2.8255 | 0.007654 | -2.3713 | 0.01906  |
| L-Aspartic acid                    | 2.642   | 0.012121 | 1.113   | 0.029603 |
| Malonic acid                       | 2.5787  | 0.014152 | 1.121   | 0.033912 |
| D-Ribofuranoside                   | -2.5237 | 0.016169 | -1.3815 | 0.038026 |
| Threonine                          | 2.4841  | 0.017779 | 1.012   | 0.041053 |
| L-Homoserine                       | -2.4514 | 0.019217 | -1.001  | 0.043581 |
| Lysine                             | -2.4245 | 0.020478 | -0.984  | 0.045627 |
| Phthalic acid                      | 2.3886  | 0.022276 | 0.982   | 0.048778 |

---

\*Fold Change ,CR-kp positive/negative; FDR-adjusted was corrected using the Benjamini–Hochberg multiple correction method.
